# Supplementary material for: Individual- and community-level determinants of child immunization in the Democratic Republic of Congo: A multilevel analysis
Source: PubMed Central journal article supplement (PMC6107214; doi:10.1371/journal.pone.0202742), 2018-08-23

### Level of full immunization coverage in DRC (2013-14)

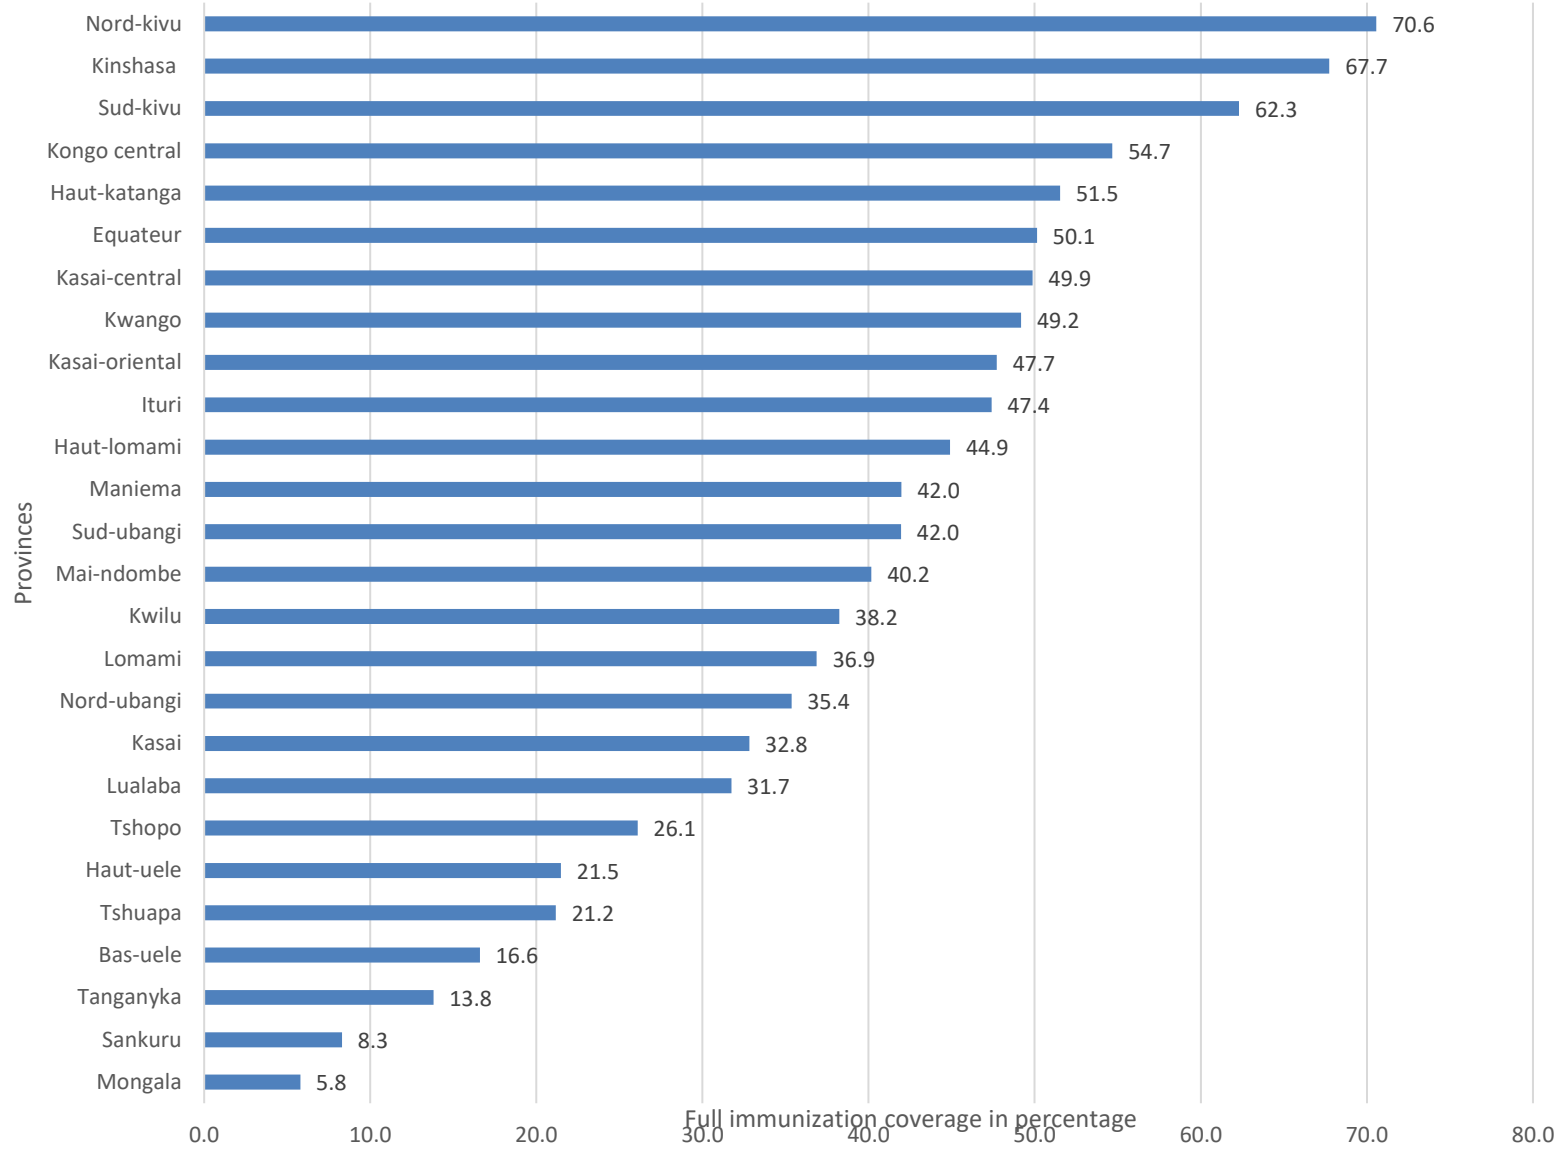

Supplement: pone.0202742.s001.pdf [file pone.0202742.s001.pdf]
